# Supplementary material
Source: PubMed Central journal article supplement (PMC4983215)
Supplement: NIHMS801378-supplement-Supp_Info.pdf [file NIHMS801378-supplement-Supp_Info.pdf]

### Short Structural Variant (SSV) Evaluation System

Use this program to find and evaluate a list of short structural genomic variants (insertions, deletions, and microsatellites) found in the human genome within a set of user-specified chromosome ranges. The program searches a database of short structural variants (dbSSV) and writes the search results to the local "Full Report" worksheet with annotations and scoring components for each SSV to derive a total biological impact score. A shorter summary report is also written to the local worksheet "Brief Report". Optionally, these reports can also be written to an external file. Use highlighted cells in this "Browser" worksheet to set program options. Cells highlighted "yellow" require keyboard typing. Cells highlighted "blue" require mouse selection. For help on using the Table Browser, see notes below.

|                                                                             |                                       |                                                                                                                               |                                                                                 |                                                            |
|-----------------------------------------------------------------------------|---------------------------------------|-------------------------------------------------------------------------------------------------------------------------------|---------------------------------------------------------------------------------|------------------------------------------------------------|
| <b>Method to Specify region(s) to be searched (using HG19 coordinates):</b> | <input type="radio"/> Specified Range | chr1:1,168,600-1,169,050                                                                                                      | Search Name (optional):                                                         | Test                                                       |
|                                                                             | <input type="radio"/> From Range List | (If multiple ranges are to be searched together, then pick a "List" option, and create list on the "Search Ranges" worksheet) |                                                                                 |                                                            |
| <input checked="" type="radio"/> From Gene List                             |                                       |                                                                                                                               |                                                                                 |                                                            |
| <b>Add additional padding to sequence ranges?</b>                           | Bases added to each end:              | 10,000                                                                                                                        | Output file name:                                                               | TOMM40 Region                                              |
| <b>Adjustable system settings:</b>                                          | GWAS Track:                           | Alzheimer's Disease                                                                                                           | (Click to get pick list.)                                                       | Folder location of data a reports (leave blank if local.): |
|                                                                             | Range to avg Reg. Data:               | 340                                                                                                                           | (Click to get pick list.)                                                       |                                                            |
|                                                                             | Range to avg Cons. Data:              | 225                                                                                                                           | (Click to get pick list.)                                                       |                                                            |
|                                                                             | Scoring Method:                       | Default Scoring                                                                                                               | (Click to get pick list. To set custom scoring, go to Scoring Rules worksheet.) |                                                            |
|                                                                             | Tissue Type for Regulatory Data:      | BHM - Brain Hippocampus Middle                                                                                                | (Click to get pick list.)                                                       |                                                            |
|                                                                             | Range to avg miRNA Data:              | 2000                                                                                                                          | (Click to get pick list.)                                                       |                                                            |
| Get output:                                                                 | RUN                                   |                                                                                                                               | (Click to run search and scoring.)                                              |                                                            |

#### SV Search, Copyright © 2016, Polymorphic DNA Technologies, Inc.

|                          |           |                          |           |
|--------------------------|-----------|--------------------------|-----------|
| Software Version Number: | V4.1      | Database Version Number: | V4.1      |
| Software Version Date:   | 3/28/2016 | Database Version Date:   | 3/28/2016 |

(see "Source Info" worksheet for names, versions, and sources of all genomic data)

**Supp. Figure S1.** Image of the main "Browser" page for the SSV Search program. Several "option button" controls are used to choose whether to specify the search range(s) directly with a chromosome range, or by using a separate list of either ranges or gene names. The inclusion of outside padding of each range can be achieved by specifying the number of base-pairs to add. There are also five "list box" controls that are used to specify key parameters and selections. For example, there is a "GWAS" list box, which permits selection of a specific genome-wide track of GWAS signals, and a tissue type list box, which is used to specify the particular tissue-type source for regulatory signals. A "RUN" button on the Browser page runs the macro to perform the search.

## Supp. Figure S2A

| Scoring for Numerical Properties  |                                  |                                  |                                                                                                                                                                  |               |               | Default Settings |               | Custom Settings |               |
|-----------------------------------|----------------------------------|----------------------------------|------------------------------------------------------------------------------------------------------------------------------------------------------------------|---------------|---------------|------------------|---------------|-----------------|---------------|
| Field Name                        | Property Measured                | Source Track                     | Derivation                                                                                                                                                       | Average Value | Maximum value | Weight Factor    | Maximum Score | Weight Factor   | Maximum Score |
| No. of Variants                   | Variability                      | dbSSV                            | Obtained by scanning dbSNP                                                                                                                                       | 1.1           | 9             | 0.6              | 5             | 0.6             | 5             |
| Size Range of Variation           | Variability                      | dbSSV                            | Obtained by scanning dbSNP                                                                                                                                       | 2.7           | 48            | 0.35             | 10            | 0.35            | 10            |
| SSR Slippage                      | Variability                      | Local worksheet "Slippage Index" | Proprietary table derived from PCR slippage experiments on 200 SSRs                                                                                              | 1.9           | 40            | 0.15             | 5             | 0.15            | 5             |
| Cluster Index                     | Synergy of consecutive variants  | Calculated during reporting      | Program assigns a value of "1" to the a neighboring variant if within 4 nucleotides. Uses value of "3" if an SSR.                                                | 0.3           | 6             | 1.00             | 6             | 1.00            | 6             |
| GWAS Log(1-Log(p))                | Association with a trait         | Custom dbGWAS                    | GWAS data sets were converted to continuous tracks of signal, $S = \text{Log}(1-\text{Log}(p))$ .                                                                | 0.2           | 2.4           | 15.0             | 25            | 15.0            | 25            |
| H3K4me1 Value                     | Nearby regulatory element        | Tissue-specific dbREG            | Downloaded from NIH Epigenomics Roadmap, for the assay H3K4me1, for various tissues and donors. Local program smoothens signal over user-defined window.         | 2.6           | 48.0          | 0.16             | 5             | 0.16            | 5             |
| H3K4me3 Value                     | Nearby regulatory element        | Tissue-specific dbREG            | Downloaded from NIH Epigenomics Roadmap, for the assay H3K4me3, for various tissues and donors. Local program smoothens signal over user-defined window.         | 2.8           | 100.0         | 0.16             | 5             | 0.16            | 5             |
| H3K9ac Value                      | Nearby regulatory element        | Tissue-specific dbREG            | Downloaded from NIH Epigenomics Roadmap, for the assay H3K9ac, for various tissues and donors. Local program smoothens signal over user-defined window.          | 2.7           | 85.0          | 0.16             | 5             | 0.16            | 5             |
| H3K27ac Value                     | Nearby regulatory element        | Tissue-specific dbREG            | Downloaded from NIH Epigenomics Roadmap, for the assay H3K27ac, for various tissues and donors. Local program smoothens signal over user-defined window.         | 1             | 52            | 0.16             | 5             | 0.16            | 5             |
| Dnase Value                       | Nearby regulatory element        | Tissue-specific dbREG            | Downloaded from NIH Epigenomics Roadmap, for the assay DNase, for various tissues and donors. Local program smoothens signal over user-defined window.           | 2.00          | 800           | 0.02             | 5             | 0.02            | 5             |
| RRBS Value                        | Nearby regulatory element        | Tissue-specific dbREG            | Downloaded from NIH Epigenomics Roadmap, for the assay RRBS, for various tissues and donors. Local program smoothens signal over user-defined window.            | 0.20          | 10            | 2.00             | 5             | 2.00            | 5             |
| TS miRNA Value                    | Nearby regulatory element        | dbOREG                           | Downloaded from TargetScan's track for micro RNA. Peak signals were extended and attenuated over ranges of either 60 bp, 400 bp, or 2,000 bp, as chosen by user. | 80            | 160           | 0.04             | 5             | 0.04            | 5             |
| TFBS ChIP Value                   | Signal for TF Binding Sites      | dbTFBS                           | Downloaded from wgEncodeRegTfbsClusteredV3. Multiple signals combined by summing squares and taking square root.                                                 | 700           | 4000          | 0.0030           | 5             | 0.0030          | 5             |
| TFBS in silico Value              | Signal for TF Binding Sites      | dbTFBS                           | Downloaded from tfbsConsSites. Signals are extended over 200 bp window. Multiple signals combined by summing squares and taking square root.                     | 700           | 4000          | 0.0030           | 5             | 0.0030          | 5             |
| Mammal Cons. Value                | Region conserved among mammals   | Custom dbCONS                    | Track "phastCons46wayPlacental", smoothed over 25 bp (S = short)                                                                                                 | 0.06          | 1.00          | 0.0              | 0             | 0.0             | 0             |
| Mammal Cons. Value, large window  | Region conserved among mammals   | Custom dbCONS                    | Mammal Cons. Track, further smoothed over specified range (L = long)                                                                                             | 0.06          | 1.00          | 0.0              | 0             | 0.0             | 0             |
| Mammal Cons. Value Difference     | Local drop in conservation value | calculated                       | Difference of "L - S" for Mammals                                                                                                                                | 0.04          | 1.00          | 25.0             | 10            | 25.0            | 10            |
| Primate Cons. Value               | Region conserved among Primates  | Custom dbCONS                    | Track "phastCons46wayPrimates", smoothed over 25 bp (S = short)                                                                                                  | 0.06          | 1.00          | 0.0              | 0             | 0.0             | 0             |
| Primate Cons. Value, large window | Region conserved among Primates  | Custom dbCONS                    | Primate Cons. Track, further smoothed over specified range (L = long)                                                                                            | 0.06          | 1.00          | 0.0              | 0             | 0.0             | 0             |
| Primate Cons. Value Difference    | Local drop in conservation value | calculated                       | Difference of "L - S" for Primates                                                                                                                               | 0.04          | 1.00          | 0.0              | 0             | 0.0             | 0             |
| Intron Size                       | Intron Size                      | Custom dbGEN                     | Feature size from RefSeq track                                                                                                                                   | 2000          | over 100,000  | 5.0              | 3             | 5.0             | 3             |

**Supp. Figure S2B****Scoring for Qualitative Features****Location in Gene**

| Location Type | Default Value | Custom Value |
|---------------|---------------|--------------|
| Intron        | 2             | 2            |
| Promoter      | 7             | 7            |
| 3'UTR         | 7             | 7            |
| 5'UTR         | 8             | 8            |
| Exon          | 9             | 9            |

T

|                |   |   |
|----------------|---|---|
| Maximum score: | 9 | 9 |
|----------------|---|---|

**RepeatMasker Class**

| Repeat Class   | Default Value | Custom Value |
|----------------|---------------|--------------|
| DNA            | 2             | 2            |
| LINE           | 2             | 2            |
| SINE           | 2             | 2            |
| Simple_repeat  | 4             | 4            |
| Low_complexity | 5             | 5            |
| LTR            | 5             | 5            |

|                |   |   |
|----------------|---|---|
| Maximum Score: | 5 | 5 |
|----------------|---|---|

**Genome Segment Type**

| Symbol | Default Value | Custom Value | Segment Type      |
|--------|---------------|--------------|-------------------|
| TSS    | 2             | 2            | Promoter-like     |
| PF     | 1             | 1            | Promoter flanking |
| E      | 3             | 3            | Enhancer          |
| WE     | 1             | 1            | Weak enhancer     |
| CTCF   | 3             | 3            | CTCF-enriched     |
| T      | 1             | 1            | Transcribed       |
| R      | 0             | 0            | Low Activity      |

|                |   |   |
|----------------|---|---|
| Maximum Score: | 3 | 3 |
|----------------|---|---|

**Supp. Figure S2.** The ‘Scoring Rules’ worksheet in the SV Search program file. This worksheet contains our current preferred parameters, which are listed as default settings. There are also cells available to the user for custom scoring. **(A)** Shows the part of this worksheet used for scoring numerical parameters. For these, each partial score is calculated by multiplying the data value by the weighting factor. **(B)** Shows the part of the worksheet used for certain qualitative fields. For each text description, the appropriate look-up value is used for the partial score. The program combines all partial scores into category scores for use in the Brief Report and then combines all category scores to produce the final “Total Impact Score”.

**A. AD TOMM40**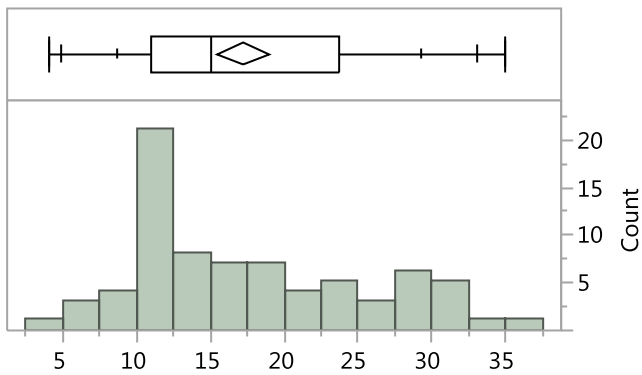**B. Obesity HRH3**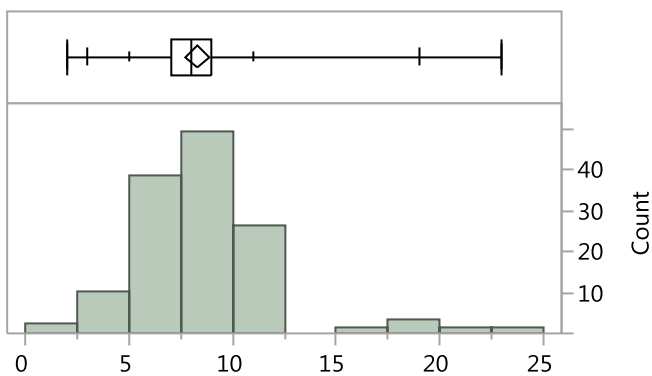**C. ALS SOD1**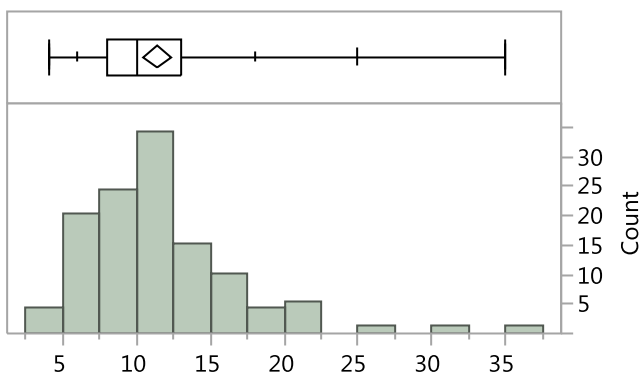

**Supp. Figure S3. The distribution of total potential impact scores for three examples of genetic association studies.** Distributions are shown for (A) AD and the TOMM40 gene, (B) Obesity and the HRH3 gene and (C) Amyotrophic Lateral Sclerosis (ALS) ALS and the SOD1 gene. In this search the GWAS track was not used. Literature reports that support the association of these genes with the specific diseases are given in Roses et al. for AD and TOMM40, Yoshimoto et al. for obesity, and HRH3 and Tafuri et al. for ALS and SOD1.

The quantile box plot, located above the histogram distribution is a simple, graphical depiction of the quantiles of the distribution: the 25% and 75% quartiles are defined by the rectangle with the median as the line in the middle; the diamond shows the mean and 95% confidence interval for the mean; the short, horizontal lines on either side of the rectangle define quantiles: 0.5%, 2.5%, 10%, 90%, 97.5% and 99.5%.

### **Supp. References**

- Roses AD, Lutz MW, Amrine-Madsen H, Saunders AM, Crenshaw DG, Sundseth SS, et al. A TOMM40 variable-length polymorphism predicts the age of late-onset Alzheimer's disease. *Pharmacogenomics J.* 2010;10(5):375-84. PMID: PMC2946560.
- Tafari F, Ronchi D, Magri F, Comi GP, Corti S. SOD1 misplacing and mitochondrial dysfunction in amyotrophic lateral sclerosis pathogenesis. *Front Cell Neurosci.* 2015;9:336. PMID: PMC4548205.
- Yoshimoto R, Miyamoto Y, Shimamura K, Ishihara A, Takahashi K, Kotani H, et al. Therapeutic potential of histamine H3 receptor agonist for the treatment of obesity and diabetes mellitus. *Proc Natl Acad Sci U S A.* 2006;103(37):13866-71. PMID: PMC1560086.

**Supp. Table S1. Sources for Data Sets Used in dbSSV**

| Description                     | Track Name                             | Version Date | Source                                                                   |
|---------------------------------|----------------------------------------|--------------|--------------------------------------------------------------------------|
| Human Reference Sequence        | GRCh37/hg19                            | Feb-09       | hgdownload.cse.ucsc.edu/goldenPath/hg19/chromosomes/                     |
| Polymorphism data from dbSNP    | SNP142                                 | Nov-14       | genome.ucsc.edu/cgi-bin/hgTables                                         |
| Recombination Rates from HapMap | Recombination                          | Jun-08       | hapmap.ncbi.nlm.nih.gov/downloads/recombination/latest/rates/            |
| RefSeq Genes                    | refGene                                | Oct-11       | hgdownload.cse.ucsc.edu/goldenPath/hg19/database/refgene.txt             |
| Mammalian Conservation          | phastCons46wayPlacental                | Nov-09       | hgdownload.cse.ucsc.edu/goldenPath/hg19/phastCons46way/placentalMammals/ |
| Primate Conservation            | phastCons46wayPrimates                 | Nov-09       | hgdownload.cse.ucsc.edu/goldenPath/hg19/phastCons46way/primates/         |
| GWAS Data Sets                  | GWAS Catalog                           | Mar-15       | genome.gov/gwastudies                                                    |
| Repeats, RepeatMasker           | rmsk                                   | Apr-09       | hgdownload.cse.ucsc.edu/goldenPath/hg19/database/rmsk.txt                |
| Regulation, H3K4me1, BHM        | EA9BHMH3K4me112Sig                     | May-15       | abesapien.stamlab.org/cgi-bin/hgTables                                   |
| Regulation, H3K4me1, BITL       | EA9BITLH3K4me112Sig                    | May-15       | abesapien.stamlab.org/cgi-bin/hgTables                                   |
| Regulation, H3K4me1, BMFL       | EA9BMFLH3K4me112Sig                    | May-15       | abesapien.stamlab.org/cgi-bin/hgTables                                   |
| Regulation, H3K4me1, BSN        | EA9BSNH3K4me112Sig                     | May-15       | abesapien.stamlab.org/cgi-bin/hgTables                                   |
| Regulation, H3K4me3, BHM        | EA9BHMH3K4me312Sig                     | May-15       | abesapien.stamlab.org/cgi-bin/hgTables                                   |
| Regulation, H3K4me3, BITL       | EA9BITLH3K4me312Sig                    | May-15       | abesapien.stamlab.org/cgi-bin/hgTables                                   |
| Regulation, H3K4me3, BMFL       | EA9BMFLH3K4me312Sig                    | May-15       | abesapien.stamlab.org/cgi-bin/hgTables                                   |
| Regulation, H3K4me3, BSN        | EA9BSNH3K4me312Sig                     | May-15       | abesapien.stamlab.org/cgi-bin/hgTables                                   |
| Regulation, H3K9ac, BHM         | EA9BHMH3K9ac 12Sig                     | May-15       | abesapien.stamlab.org/cgi-bin/hgTables                                   |
| Regulation, H3K9ac, BITL        | EA9BITLH3K9ac 12Sig                    | May-15       | abesapien.stamlab.org/cgi-bin/hgTables                                   |
| Regulation, H3K9ac, BMFL        | EA9BMFLH3K9ac 12Sig                    | May-15       | abesapien.stamlab.org/cgi-bin/hgTables                                   |
| Regulation, H3K9ac, BSN         | EA9BSNH3K9ac 12Sig                     | May-15       | abesapien.stamlab.org/cgi-bin/hgTables                                   |
| Regulation, H3K27ac, BHM        | EA9BHMH3K27ac 1249Sig                  | May-15       | abesapien.stamlab.org/cgi-bin/hgTables                                   |
| Regulation, H3K27ac, BITL       | EA9BITLH3K27ac 1253Sig                 | May-15       | abesapien.stamlab.org/cgi-bin/hgTables                                   |
| Regulation, H3K27ac, BMFL       | EA9BMFLH3K27ac 1251Sig                 | May-15       | abesapien.stamlab.org/cgi-bin/hgTables                                   |
| Regulation, H3K27ac, BSN        | EA9BSNH3K27ac 4947Sig                  | May-15       | abesapien.stamlab.org/cgi-bin/hgTables                                   |
| Regulation, Dnase I, FB         | EA9FBDNase 1072Sig                     | May-15       | abesapien.stamlab.org/cgi-bin/hgTables                                   |
| Regulation, RRBS, BITL          | EA9BITLRRBS4970Sig                     | May-15       | abesapien.stamlab.org/cgi-bin/hgTables                                   |
| Regulation, RRBS, BMFL          | EA9BMFLRRBS4967Sig                     | May-15       | abesapien.stamlab.org/cgi-bin/hgTables                                   |
| Regulation, RRBS, BSN           | EA9BSNRRBS1272Sig                      | May-15       | abesapien.stamlab.org/cgi-bin/hgTables                                   |
| Regulation, TS miRNA sites      | targetScanS                            | Dec-10       | genome.ucsc.edu/cgi-bin/hgTables                                         |
| Regulation, Txn Factor ChiP     | wgEncodeRegTfbsClusteredV3             | Jul-13       | genome.ucsc.edu/cgi-bin/hgTables                                         |
| Regulation, TFBS Conserved      | tfbsConsSites                          | Mar-11       | genome.ucsc.edu/cgi-bin/hgTables                                         |
| Genome Segmentations            | hub_4607_GM12878_Combined_segmentation | Jan-11       | genome.ucsc.edu/cgi-bin/hgTables                                         |

This table provides a list of the track names and websites used to download each type of data used in the dbSSV system.

**Supp. Table S2. Derivation of dbSSV Fields**

| Name of Field                                                                        | Property                                                                                            | Data Source                            | Derivation method                                                                                                                                                                                                                                                                        |
|--------------------------------------------------------------------------------------|-----------------------------------------------------------------------------------------------------|----------------------------------------|------------------------------------------------------------------------------------------------------------------------------------------------------------------------------------------------------------------------------------------------------------------------------------------|
| Column A. Chromosome Number                                                          | Integer value of chromosome number                                                                  | GRCh37/hg19                            | Autosomal chromosomes numbered normally. ChrX = 23, ChrY = 24, ChrM not covered.                                                                                                                                                                                                         |
| Column B. Chromosome Position                                                        | Integer value of chromosome number                                                                  | GRCh37/hg19, SNP142                    | Position from dbSNP. For variants with a position range, the lowest integer is used.                                                                                                                                                                                                     |
| Column C. Variant Type                                                               | Type of variant (insertion, deletions, etc.)                                                        | SNP142                                 | Type defined by dbSNP, except for simple sequence repeats which are called SSRs                                                                                                                                                                                                          |
| Column D. Symbol                                                                     | Symbolic description of variation                                                                   | SNP142                                 | Usually a pair of alleles separated by a "/", with the reference allele list first. E.g., an "A" insertion is "-/A".                                                                                                                                                                     |
| Column E. Span in Reference Sequence (bp)                                            | Range size for reference allele                                                                     | SNP142                                 | For deletions, this is the size deleted. For insertions, value is zero.                                                                                                                                                                                                                  |
| Column F. Representative Variant Name                                                | Reference SNP (refSNP) ID from dbSNP, if any                                                        | SNP142                                 | When multiple IDs describe the same variant, the version with the lowest chromosome position is used.                                                                                                                                                                                    |
| Column G. No. of Known Variants in dbSNP                                             | No. of named variants overlapping with an SSR span                                                  | SNP142                                 | Obtained by scanning dbSNP                                                                                                                                                                                                                                                               |
| Column H. Nucleotide Size Range in dbSNP                                             | Size difference between shortest and longest allele                                                 | SNP142                                 | Obtained by scanning dbSNP                                                                                                                                                                                                                                                               |
| Column I. SSR Slippage Index                                                         | Estimated mutability of an SSR                                                                      | Proprietary table                      | Table derived from PCR slippage experiments on 200 different SSRs                                                                                                                                                                                                                        |
| Column J. Repeat Name                                                                | RepeatMasker Repeat Name                                                                            | Repeatmasker                           | Directly from RepeatMasker                                                                                                                                                                                                                                                               |
| Column K. Repeat Class                                                               | RepeatMasker Repeat Class                                                                           | Repeatmasker                           | Directly from RepeatMasker                                                                                                                                                                                                                                                               |
| Column L. Repeat Family                                                              | RepeatMasker Repeat Family                                                                          | Repeatmasker                           | Directly from RepeatMasker                                                                                                                                                                                                                                                               |
| Column M. Clustering Index                                                           | Synergy of consecutive variants                                                                     | Calculated                             | Neighboring variants are given scores based on nearness and variant type.                                                                                                                                                                                                                |
| Column N. Associated Gene                                                            | Gene name, if variant is within or close to that gene                                               | refGene                                | Directly from refGene                                                                                                                                                                                                                                                                    |
| Column O. RefSeq Accession Number                                                    | Name of gene expression track                                                                       | refGene                                | Directly from refGene                                                                                                                                                                                                                                                                    |
| Column P. Gene Feature                                                               | Coding Exon, Intron, 5'-UTR, 3'UTR, or Promoter                                                     | refGene                                | Directly from refGene                                                                                                                                                                                                                                                                    |
| Column Q. Strand                                                                     | Transcription dir. of gene relative to chrom. sequence                                              | refGene                                | Directly from refGene                                                                                                                                                                                                                                                                    |
| Column R. Feature Size                                                               | Size of gene feature in bp                                                                          | refGene                                | From coordinates of feature in refGene                                                                                                                                                                                                                                                   |
| Column S. Position in Feature                                                        | Position of variant within feature                                                                  | refGene                                | From coordinates of feature in refGene                                                                                                                                                                                                                                                   |
| Column T. Mammal, 25 bp window                                                       | Conservation of region in mammals                                                                   | phastCons46wayPlacental                | phastCons46wayPlacental values, averaged over 25 bp                                                                                                                                                                                                                                      |
| Column U. Mammal, 75 bp window                                                       | Conservation of region in mammals                                                                   | phastCons46wayPlacental                | phastCons46wayPlacental values, averaged over 75 bp                                                                                                                                                                                                                                      |
| Column V. Mammal, 125 bp window                                                      | Conservation of region in mammals                                                                   | phastCons46wayPlacental                | phastCons46wayPlacental values, averaged over 125 bp                                                                                                                                                                                                                                     |
| Column W. Mammal, 225 bp window                                                      | Conservation of region in mammals                                                                   | phastCons46wayPlacental                | phastCons46wayPlacental values, averaged over 225 bp                                                                                                                                                                                                                                     |
| Column X. Primate, 25 bp window                                                      | Conservation of region in primates                                                                  | phastCons46wayPrimates                 | phastCons46wayPrimates values, averaged over 25 bp                                                                                                                                                                                                                                       |
| Column Y. Primate, 75 bp window                                                      | Conservation of region in primates                                                                  | phastCons46wayPrimates                 | phastCons46wayPrimates values, averaged over 75 bp                                                                                                                                                                                                                                       |
| Column Z. Primate, 125 bp window                                                     | Conservation of region in primates                                                                  | phastCons46wayPrimates                 | phastCons46wayPrimates values, averaged over 125 bp                                                                                                                                                                                                                                      |
| Column AA. Primate, 225 bp window                                                    | Conservation of region in primates                                                                  | phastCons46wayPrimates                 | phastCons46wayPrimates values, averaged over 225 bp                                                                                                                                                                                                                                      |
| Columns AB through AT. GWAS_001 through GWAS_019                                     | Signal derived from Genome Wide Association Studies for each of 19 different phenotypes             | GWAS Catalog                           | P-values for associated SNPs from the GWAS catalog are converted to a signal defined as $\text{Log}(1-\text{Log}(p))$ . A continuous track of this signal is calculated by using the recombination-rate track to determine the reduction over distance of this value in both directions. |
| Column BF LD Block Name                                                              | Name assigned consecutively to an extended chromosomal range with a low recombination rate.         | Recombination Rates from HapMap        | LD Block is defined here as a chromosomal region that has no sites with a recombination rate greater than 3.0 units.                                                                                                                                                                     |
| Column BG LD Block start position                                                    | Chromosome position of beginning of LD block                                                        | Recombination Rates from HapMap        | LD Block is defined here as a chromosomal region that has no sites with a recombination rate greater than 3.0 units.                                                                                                                                                                     |
| Column BH LD Block end position                                                      | Chromosome position of end of LD block                                                              | Recombination Rates from HapMap        | LD Block is defined here as a chromosomal region that has no sites with a recombination rate greater than 3.0 units.                                                                                                                                                                     |
| Columns BI through GD. Regulatory data for various tissues from NIH Roadmap project. | Regulatory signals for H3K4me1, H3K4me3, H3K9ac, H3K27ac, Dnase, and RRBS, for various tissue types | NIH Roadmap Epigenetics Project        | Various regulatory tracks are averaged over windows of 100 bp, 220 bp, and 340 bp.                                                                                                                                                                                                       |
| Column GE. miRNA, 60 bp window                                                       | Signal for miRNA sites from Target Scan miRNA                                                       | targetScanS                            | Peak signal value extended over a 60 bp window.                                                                                                                                                                                                                                          |
| Column GF. miRNA, 400 bp window                                                      | Signal for miRNA sites from Target Scan miRNA                                                       | targetScanS                            | Peak signal value, linearly attenuated over +/- 200 bp flanking.                                                                                                                                                                                                                         |
| Column GF. miRNA, 2000 bp window                                                     | Signal for miRNA sites from Target Scan miRNA                                                       | targetScanS                            | Peak signal value, linearly attenuated over +/- 1000 bp flanking.                                                                                                                                                                                                                        |
| Column GK, Txn Factor binding site name                                              | Name of Transcription binding site, from ChiP                                                       | wgEncodeRegTfbsClusteredV3             | Directly from wgEncodeRegTfbsClusteredV3. Multiple names are concatenated.                                                                                                                                                                                                               |
| Column GL, Txn Factor binding site signal                                            | Signal from Transcription binding site, from ChiP                                                   | wgEncodeRegTfbsClusteredV3             | Directly from wgEncodeRegTfbsClusteredV3. Multiple signals combined by summing squares and taking square root                                                                                                                                                                            |
| Column GM, Txn Factor binding site name                                              | Name of Transcription binding site, in silico derived                                               | tfbsConsSites                          | From tfbsConsSites adding +/-100 bp of flanking. Multiple names are concatenated.                                                                                                                                                                                                        |
| Column GN, Txn Factor binding site signal                                            | Signal from Transcription binding site, in silico derived                                           | tfbsConsSites                          | From tfbsConsSites, extended over 200 bp window. Multiple signals combined by summing squares and taking square root.                                                                                                                                                                    |
| Column GQ, Genome Segmentation                                                       | Predicted regulatory status of regions                                                              | hub_4607_GM12878_Combined_segmentation | TSS = "Promoter-like", PF = Promoter flanking, E = Enhancer, WE = Weak enhancer, CTCF = CTCF-enriched, T = Transcribed, R = Low Activity                                                                                                                                                 |

This table describes the property and derivation of each field found in dbSSV.
